# Supplementary material
Source: publisher site journal article supplement (https://www.dovepress.com/article/495121)
Supplement: Supplementary file 1 [file get_supplementary_file.php]

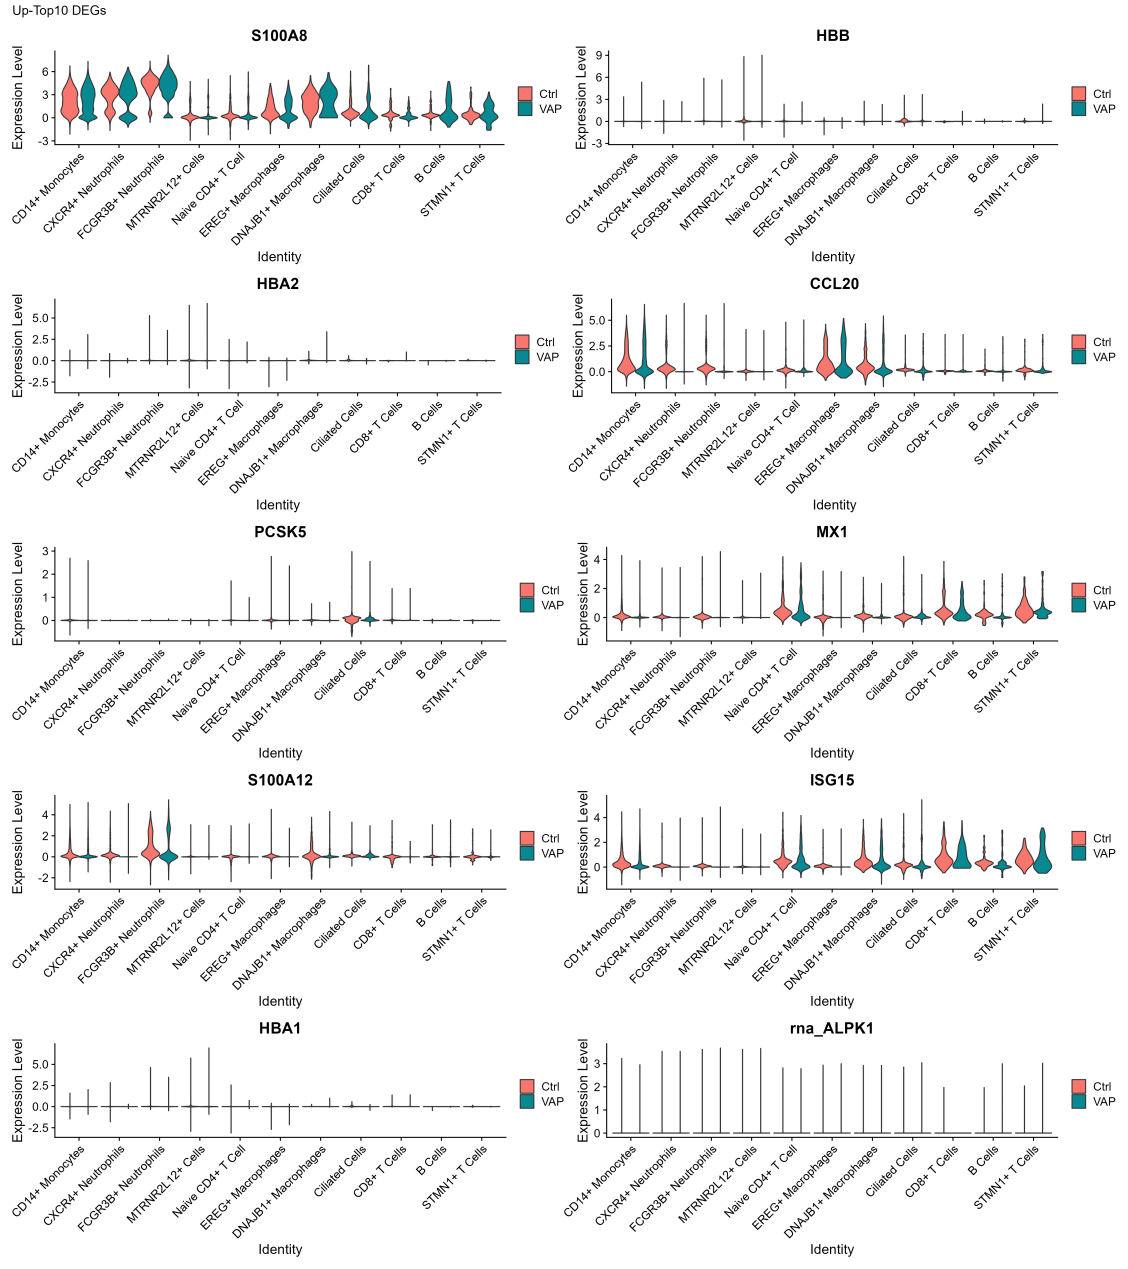


**Supplementary Figure 1**: The expression levels of the top-10 expressed upregulated DEGs.


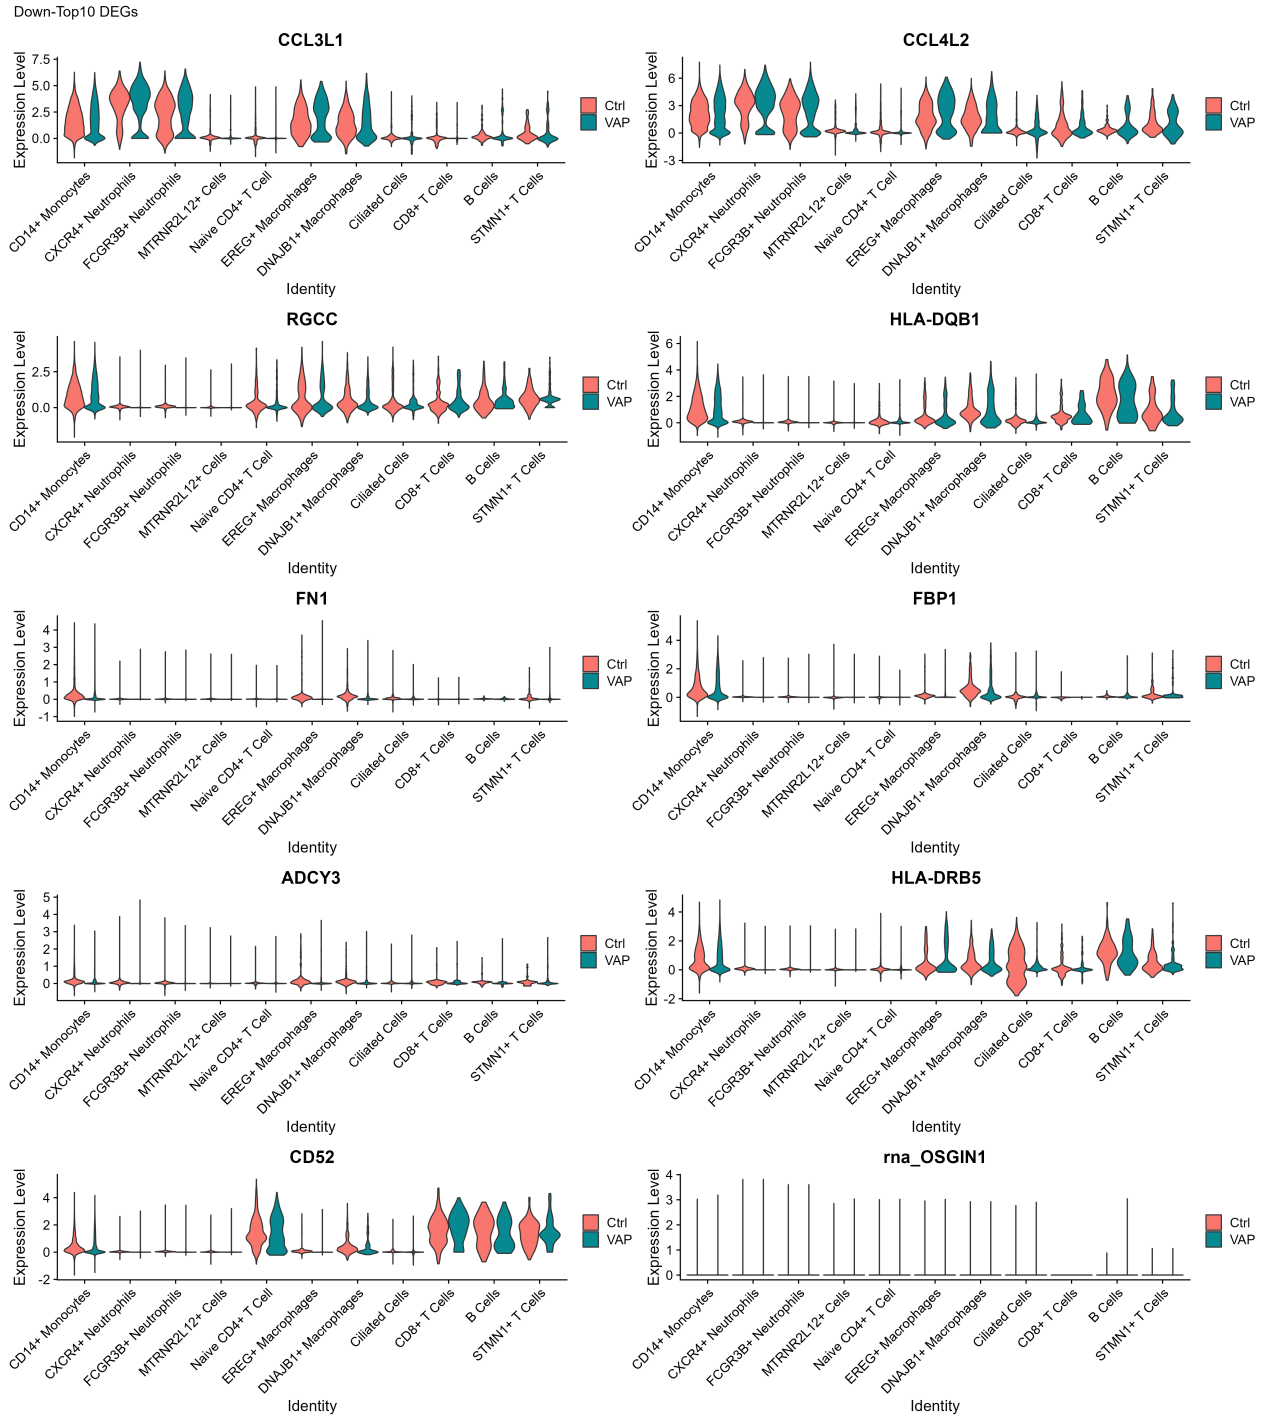


**Supplementary Figure 2:** The expression levels of the top-10 expressed down-regulated DEGs.

**Supplementary 3**

**Sample Collection Method**

For patients with endotracheal intubation, sputum was collected via tracheal suctioning through the endotracheal tube using sterile techniques. Specifically, a closed suction system or sterile suction catheter was employed to minimize contamination and ensure sample integrity. The collected sputum was immediately transferred to a sterile container and processed within 2 hours to preserve protein stability and prevent degradation[1].

[1]Toma I, Siegel MO, Keiser J, Yakovleva A, Kim A, Davenport L, Devaney J, Hoffman EP, Alsubail R, Crandall KA, Castro-Nallar E, Pérez-Losada M, Hilton SK, Chawla LS, McCaffrey TA, Simon GL. Single-molecule long-read 16S sequencing to characterize the lung microbiome from mechanically ventilated patients with suspected pneumonia. J Clin Microbiol. 2014 Nov;52(11):3913-21.
